# Supplementary material
Source: PubMed Central journal article supplement (PMC4000352)
Supplement: 11606_2014_2790_MOESM1_ESM.pdf [file 11606_2014_2790_MOESM1_ESM.pdf]

**Supplementary Appendix Table 1. Adjusted Hazard Ratios and 95% CIs of Independent Predictors of Antihypertensive Medication Initiation Among Patients Aged 18 Years and Older with >6 Months Follow-Up After Meeting Clinical Criteria for Incident Hypertension (N=3,725)**

| Variable                                             | Adjusted HR (95% CI) |               | P value* |
|------------------------------------------------------|----------------------|---------------|----------|
| <b>PATIENT FACTORS</b>                               |                      |               |          |
| <b>Age</b>                                           |                      |               |          |
| 18-39 years                                          | 0.57                 | (0.47–0.69)   | <0.001   |
| 40-59 years                                          | 0.75                 | (0.65–0.87)   | <0.001   |
| ≥60 years (reference)                                | 1.0                  | —             | —        |
| <b>Race/Ethnicity</b>                                |                      |               |          |
| White                                                | 0.81                 | (0.68–0.98)   | 0.03     |
| Non-White <sup>†</sup> (reference)                   | 1.0                  | —             | —        |
| <b>Marital status</b>                                |                      |               |          |
| Single (reference)                                   | 1.0                  | —             | —        |
| Married/Partnered                                    | 0.96                 | (0.84–1.08)   | 0.48     |
| <b>Primary Spoken Language</b>                       |                      |               |          |
| English (reference)                                  | 1.0                  | —             | —        |
| Other                                                | 1.06                 | (0.79–1.42)   | 0.69     |
| <b>Tobacco Use</b>                                   |                      |               |          |
| Current Tobacco Use (reference)                      | 1.0                  | —             | —        |
| Former Tobacco Use                                   | 0.90                 | (0.74–1.09)   | 0.27     |
| Never Used Tobacco                                   | 0.88                 | (0.74–1.05)   | 0.17     |
| Unknown/Missing                                      | 1.41                 | (1.15–1.73)   | 0.001    |
| <b>Body mass index, kg/m<sup>2</sup></b>             | 1.012                | (1.005–1.020) | 0.001    |
| <b>On Medicaid Ever<sup>†</sup></b>                  | 1.43                 | (1.14–1.78)   | 0.002    |
| <b>JNC 7 Stage of Hypertension<sup>§</sup></b>       |                      |               |          |
| Stage 1: 140-159/90-99 mmHg                          | 0.61                 | (0.54–0.70)   | <0.001   |
| Stage 2: ≥160/100 mmHg (reference)                   | 1.0                  | —             | —        |
| <b>Baseline Comorbid Conditions</b>                  |                      |               |          |
| Anxiety                                              | 1.12                 | (0.93–1.35)   | 0.24     |
| Depression                                           | 0.85                 | (0.66–1.10)   | 0.23     |
| Hyperlipidemia                                       | 1.02                 | (0.89–1.18)   | 0.74     |
| Diabetes mellitus                                    | 1.52                 | (1.21–1.90)   | <0.001   |
| Low prevalence condition <sup>  </sup>               | 1.21                 | (0.98–1.50)   | 0.08     |
| <b>ACG<sup>  </sup> Risk Score, young index</b>      | 1.049                | (1.003–1.098) | 0.04     |
| <b>Baseline Ambulatory Visit Counts, annual mean</b> |                      |               |          |
| Primary Care Visits                                  | 1.06                 | (1.03–1.09)   | <0.001   |
| Specialty Care Visits                                | 1.07                 | (1.08–1.10)   | <0.001   |
| <b>PROVIDER FACTORS</b>                              |                      |               |          |
| <b>Primary Care Specialty</b>                        |                      |               |          |
| Internal Medicine (reference)                        | 1.0                  | —             | —        |
| Family Medicine/Family Practice                      | 0.95                 | (0.83–1.09)   | 0.49     |
| Other <sup>#</sup>                                   | 1.02                 | (0.57–1.23)   | 0.80     |
| <b>Provider Age**, years</b>                         | 0.991                | (0.986–0.996) | 0.001    |

---

\*Global p-value for proportional-hazards assumption  $p=0.125$

†Non-White: Black (4.7%), Hispanic/Latino (1.6%), Asian (2.9%), Native Hawaiian/Pacific Islander (0.5%), American Indian/Alaska Native (0.3%); Unknown (1.9%)

‡On Medicaid at any point during the baseline or study period

§JNC 7 Stage of Hypertension = severity of blood pressure elevation at study entry

||Due to low prevalence, an indicator variable was created for the presence of any of the following: atrial fibrillation, congestive heart failure, stroke/transient ischemic attack, ischemic heart disease, peripheral vascular disease, collagen vascular disease, deficiency anemia, or chronic kidney disease

¶ACG = Adjusted Clinical Group Case-Mix Assessment System

#Other = Pediatrics/Adolescent Medicine, Obstetrics/Gynecology, and Geriatrics

\*\*AMA is the source for the raw physician data (provider ages only); statistics, tables, or tabulations were prepared by User-Customer (M. Smith; PI: H. Johnson) using 2011 AMA Masterfile data.

**Supplementary Appendix Table 2. Adjusted Hazard Ratios and 95% CIs of Independent Predictors of Antihypertensive Medication Initiation Among Young Adults (18-39 years old) with >6 Months Follow-Up After Meeting Clinical Criteria for Incident Hypertension (N=1,024)**

| Variable                                             | Adjusted HR (95% CI) |             | P value*     |
|------------------------------------------------------|----------------------|-------------|--------------|
| <b>PATIENT FACTORS</b>                               |                      |             |              |
| <b>Age</b>                                           |                      |             |              |
| 18-29 years                                          | 0.70                 | (0.53–0.93) | <b>0.01</b>  |
| 30-39 years (reference)                              | 1.0                  | —           | —            |
| <b>Sex</b>                                           |                      |             |              |
| Male                                                 | 0.65                 | (0.50–0.85) | <b>0.001</b> |
| <b>Race/Ethnicity</b>                                |                      |             |              |
| White                                                | 0.69                 | (0.49–0.97) | <b>0.03</b>  |
| Non-White <sup>†</sup> (reference)                   | 1.0                  | —           | —            |
| <b>Tobacco Use</b>                                   |                      |             |              |
| Current Tobacco Use (reference)                      | 1.0                  | —           | —            |
| Former Tobacco Use                                   | 1.14                 | (0.78–1.68) | 0.50         |
| Never Used Tobacco                                   | 0.93                 | (0.65–1.31) | 0.66         |
| Unknown/Missing                                      | 1.47                 | (0.96–2.26) | 0.08         |
| <b>Body mass index, kg/m<sup>2</sup></b>             | 1.00                 | (0.99–1.02) | 0.80         |
| <b>On Medicaid Ever<sup>‡</sup></b>                  | 1.68                 | (1.20–2.34) | <b>0.002</b> |
| <b>JNC 7 Stage of Hypertension<sup>§</sup></b>       |                      |             |              |
| Stage 1: 140-159/90-99 mmHg                          | 0.64                 | (0.49–0.86) | <b>0.002</b> |
| Stage 2: ≥160/100 mmHg (reference)                   | 1.0                  | —           | —            |
| <b>Baseline Comorbid Conditions</b>                  |                      |             |              |
| Anxiety                                              | 1.05                 | (0.76–1.46) | 0.77         |
| Depression                                           | 0.86                 | (0.54–1.35) | 0.50         |
| Hyperlipidemia                                       | 1.02                 | (0.70–1.51) | 0.90         |
| Diabetes mellitus                                    | 1.51                 | (0.80–2.86) | 0.21         |
| <b>ACG<sup>  </sup> Risk Score, young index</b>      | 1.09                 | (0.96–1.24) | 0.18         |
| <b>Baseline Ambulatory Visit Counts, annual mean</b> |                      |             |              |
| Primary Care Visits                                  | 1.06                 | (1.00–1.12) | 0.05         |
| Specialty Care Visits                                | 1.10                 | (1.03–1.18) | <b>0.005</b> |

\*Global p-value for proportional-hazards assumption p=728

<sup>†</sup>Non-White: Black (7.8%), Hispanic/Latino (1.8%), Asian (3.0%), Native Hawaiian/Pacific Islander (0.9%), American Indian/Alaska Native (0.5%); Unknown (3.2%)

<sup>‡</sup>On Medicaid at any point during the baseline or study period

<sup>§</sup>JNC 7 Stage of Hypertension = severity of blood pressure elevation at study entry

<sup>||</sup>ACG = Adjusted Clinical Group Case-Mix Assessment System
